# Supplementary material for: Fluorescence imaging-guided cancer photothermal therapy using polydopamine and graphene quantum dot-capped Prussian blue nanocubes
Source: Royal Society of Chemistry journal article supplement (doi:10.1039/d0ra10491d), 2021-01-01
Supplement: d0ra10491d1.pdf [file d0ra10491d1.pdf]

Fluorescence imaging-guided cancer photothermal therapy using polydopamine and graphene quantum dots capped prussian blue nanocubes

**Meng Wang**<sup>1, 2</sup>, **Baolong Li**<sup>1</sup>, **Yu Du**<sup>3</sup>, **Huimin Bu**<sup>2,4</sup>, **Yanyan Tang**<sup>1</sup>, **Qingli Huang**<sup>1\*</sup>

1. *Public experimental research center of Xuzhou Medical University, Xuzhou city, Jiangsu 221004, China*
2. *Key Laboratory of Biotechnology for Medicinal Plants of Jiangsu Province and School of Life Sciences, Jiangsu Normal University, Xuzhou, Jiangsu 221116, China*
3. *Medical Technology School of Xuzhou Medical University, Xuzhou, Jiangsu 221000, China*
4. *Department of Physiology, Xuzhou Medical University, Xuzhou, Jiangsu 221004, China*
5. *\*Corresponding author: Public experimental research center of Xuzhou Medical University, Tong Shan No.209, Xuzhou, 221004, China*
6. *E-mail addresses: qlhuang@yzu.edu.cn; qlhuang@xzhmu.edu.cn(Q.L. Huang)*

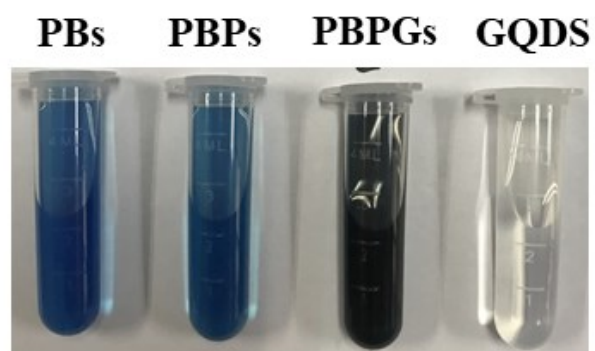

FigS1. The representative image shows the state of as-prepared samples.

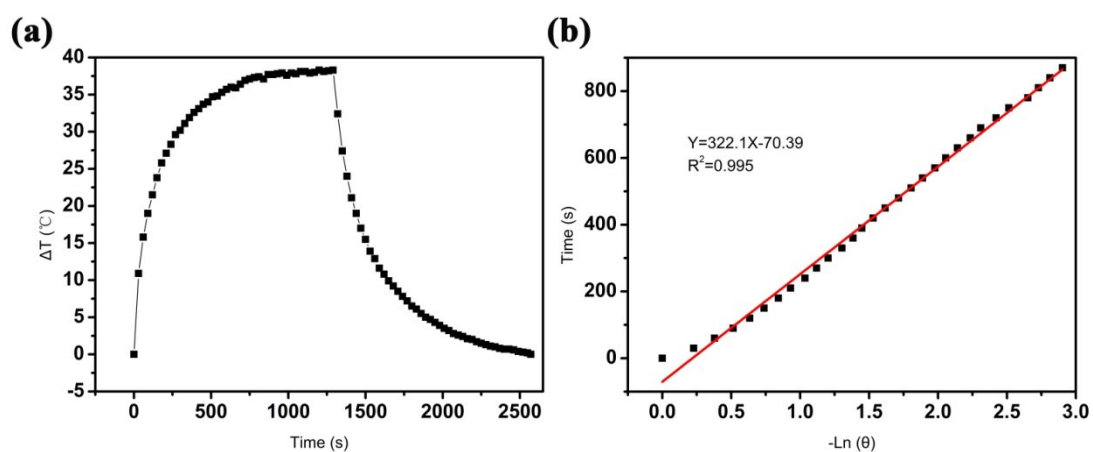

**FigS2.** (a) Photothermal curve of dispersed PBPGs suspension ( $0.5 \text{ mL}$ ,  $0.5 \text{ mg}\cdot\text{mL}^{-1}$ ) during on and off laser ( $1 \text{ W}\cdot\text{cm}^{-2}$ ) (b) Linear cooling time vs  $-\ln(\theta)$  of PBPGs acquired from photothermal curve.

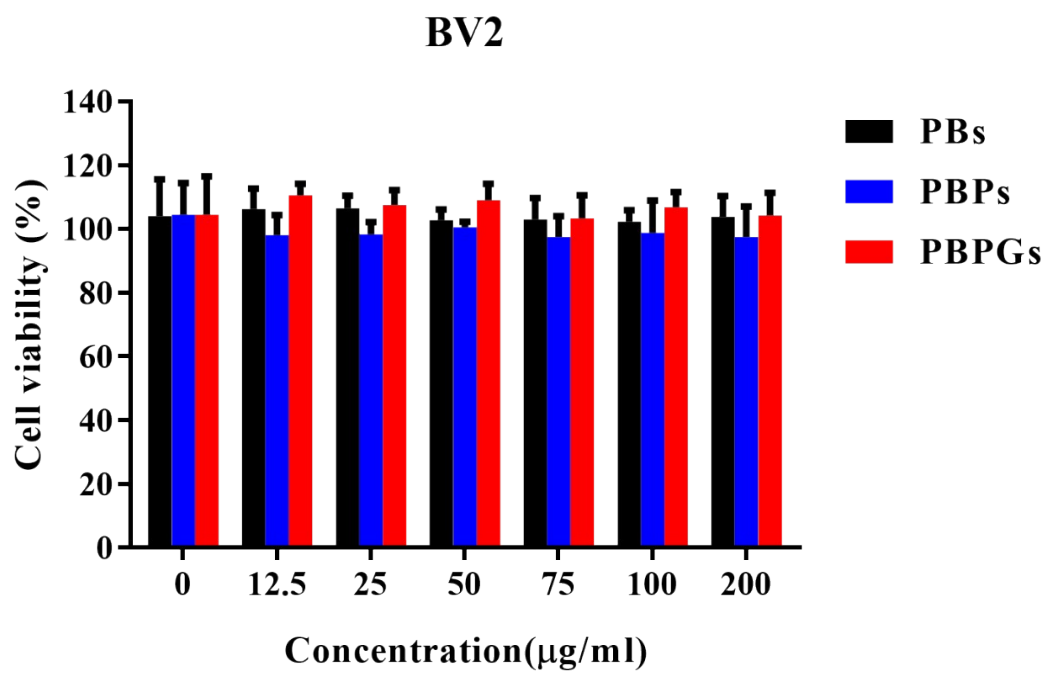

**FigS3.** The viability of mice normal neuroglial cell lines BV2 detected by CCK8 assay after incubating with different nanomaterials and different concentrations. This indicates that the material has no toxicity to normal glial cells

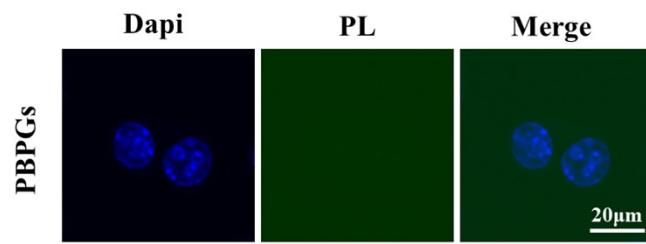

**FigS4.** CLSM images of normal glial BV2 cells incubated with PBPGs (blue refer to nucleus; green refers to fluorescence emission).
